# Supplementary material
Source: publisher figshare collection journal article supplement (https://gsapubs.figshare.com/ndownloader/files/22740947)
Supplement: Supplementary file 1 [file 22740947]

## DATA REPOSITORY. ANALYTICAL DETAILS AND RAW DATA

**Petrographic and mineralogical techniques.** Slabs 1 - 2 cm in thickness were cut from hand specimens, ground flat and polished on a vibrolap. After initial examination and photography, slab surfaces were etched in 5% HCl for 60 seconds. Stained acetate peels were prepared following treatment with acidified alizarin red-S and potassium ferricyanide (Miller, 1988). Based on peel and hand specimen fabrics, 70 polished thin sections were prepared for detailed petrographic examination. Cathodoluminescence (CL) was carried out using a CITL 8200 Mk2 cold-cathode luminoscope, operating at 10-15KV and a gun current of 200 - 300  $\mu$ A. Photoluminescence (PL) was carried out with a Nikon EF-D mercury fluorescence unit. Excitation and barrier filters were selected for blue incident light of  $\lambda = 560$  nm. The CL and PL equipment were both mounted on a Nikon Optiphot microscope and photographs taken using 400 ASA Fujicolour print film. Some polished thin sections were stained on their lower surfaces prior to mounting, to allow direct comparison of CL / PL and compositional patterns. Back-scatter scanning electron microscopy (BSEM) was performed on carbon-coated polished thin sections, using an ISI ABT55 instrument at Aberdeen University. X-ray diffraction analyses were performed on unoriented powder mounts, using Ni-filtered Cu  $\alpha$  radiation in a Siemens D-500 diffractometer, a scan speed of  $2^\circ 2\theta$  per minute and a step size of  $0.05^\circ$ . Traces were plotted on a continuous chart recorder running at 2.0 cm per minute.

**Stable isotopes in calcite and dolomite.** Between 2 - 3 mg powdered carbonate was treated for at least 4 hours in a low-temperature plasma asher to remove organic contaminants, and then reacted overnight with 100%  $\text{H}_3\text{PO}_4$  *in vacuo* (calcites at  $25^\circ\text{C}$ , dolomites at  $50^\circ\text{C}$ ). The  $\text{CO}_2$  produced was purified in a cryogenic trap and then analysed for C and O isotope ratios on a VG SIRA12 mass spectrometer at Liverpool University. A laboratory standard calibrated against NBS-19 (Liverpool LL2) was run after every 4 to 6 samples. Raw data were corrected using an acid fractionation factor ( $\alpha$ ) of 1.01025 for calcite at  $25^\circ\text{C}$  (Friedman & O'Neil, 1977) and 1.01066 for dolomite at  $50^\circ\text{C}$  (Rosenbaum & Sheppard, 1986). Analytical precision (at 95% confidence level) based on duplicate "unknown" samples was better than 0.06‰ for both  $\delta^{13}\text{C}$  and  $\delta^{18}\text{O}$ .

**Stable isotopes in barite and celestite.** Samples of 20 - 50 mg were dissolved in a 2%  $\text{Na}_2\text{CO}_3$  solution which was kept at low pH to remove any residual carbonate, following the procedure described by Longinelli & Cortecci (1970). The solution was then filtered and

mixed with  $\text{BaCl}_2$  (aq) to cause precipitation of  $\text{BaSO}_4$ . Approximately 15 mg of  $\text{BaSO}_4$  was mixed with graphite and heated to  $1100^\circ\text{C}$  *in vacuo* to produce  $\text{CO}_2$  for  $\delta^{18}\text{O}$  determination (Longinelli & Craig, 1967). BaS produced in this reaction was treated with 0.1N  $\text{AgNO}_3$  solution to precipitate  $\text{Ag}_2\text{S}$  for  $\delta^{34}\text{S}$  analysis after oxidation with pure oxygen to form  $\text{SO}_2$  (Filly *et al.*, 1975).  $\text{CO}_2$  and  $\text{SO}_2$  gas samples were analysed in a VG SIRA 9 mass spectrometer at Université Pierre et Marie Curie in Paris. Precisions based on duplicate analyses of an internal sulphate standard and unknowns were better than 0.1‰ for both  $\delta^{18}\text{O}$  and  $\delta^{34}\text{S}$ .

**Trace elements in carbonates.** Pure carbonate samples of between 5.0 - 10.0 mg were completely dissolved in 5% reagent-grade HCl, and analysed in a multichannel Thermo Jarrell Ash Polyscan 61E ICP-AES instrument at the Servei d'Espectroscòpia at Barcelona University. The spectral wavelength for each analysed element was as follows: Sr, 421.55 nm; Mn, 257.61 nm; Fe, 259.94 nm; Mg, 279.08 nm; Ba, 455.40 nm. Matrix-matched, synthetic standards were used for calibration. Analytical errors were < 10% for trace elements and < 5% for major elements.

**Fluid inclusions.** Primary inclusions with no evidence for stretching or necking were selected and measurements were carried out on a Linkam THM600 stage fitted to a Nikon Optiphot II-POL microscope. Ramp rate was set to  $10^\circ$  per minute up to  $100^\circ\text{C}$  and  $1^\circ$  intervals to homogenization point. Final resolution of homogenization temperature was carried out at  $0.1^\circ$  per minute ramp rate. Although sampling was directed towards saddle dolomite, a lesser number of calcite inclusions was also examined. Freezing measurements could not be accurately carried out in dolomite or calcite owing to the small size of unstretched inclusions.

TABLE DR1: CARBONATE ISOTOPIC AND GEOCHEMICAL DATA

| Sample type    | Sample number | Position (m from base) | $\delta^{13}\text{C}$ (‰ PDB) | $\delta^{18}\text{O}$ (‰ PDB) | Ca (wt %) | Mg (ppm) | Fe (ppm) | Mn (ppm) | Sr (ppm) | Ba (ppm) |
|----------------|---------------|------------------------|-------------------------------|-------------------------------|-----------|----------|----------|----------|----------|----------|
| <u>Calcite</u> |               |                        |                               |                               |           |          |          |          |          |          |
| C1             | CA2           | 1.2                    | 0.2                           | -7.5                          | N.D.      | N.D.     | N.D.     | N.D.     | N.D.     | N.D.     |
| C1             | CA6           | 10.2                   | 0.4                           | -8.0                          | N.D.      | N.D.     | N.D.     | N.D.     | N.D.     | N.D.     |
| C1             | CA9           | 10.5                   | 0.0                           | -6.8                          | 38.79     | 5300     | 193      | 70       | 1211     | 13       |
| C1             | CA37          | 12.1                   | 0.2                           | -7.0                          | 37.55     | 3300     | 150      | 106      | 686      | 5        |
| C1             | CA38          | 19.5                   | -0.6                          | -8.2                          | 37.50     | 4000     | 87       | 146      | 1268     | 5        |
| C1             | CA17          | 23.8                   | -0.2                          | -7.3                          | 38.41     | 3200     | 100      | 95       | 1709     | 17       |
| C1             | CA39          | 26.4                   | 0.0                           | -7.9                          | 37.73     | 3600     | 115      | 127      | 1916     | 6        |
| C1             | CA22          | 26.6                   | -0.1                          | -8.0                          | 38.37     | 5100     | 595      | 160      | 1609     | 54       |
| C1             | CA40          | 29.0                   | 0.0                           | -8.1                          | 38.31     | 4700     | 211      | 90       | 1726     | 12       |
| C1             | CA47          | 30.2                   | -0.8                          | -8.5                          | N.D.      | N.D.     | N.D.     | N.D.     | N.D.     | N.D.     |
| C1             | CA28          | 33.1                   | 0.5                           | -7.8                          | N.D.      | N.D.     | N.D.     | N.D.     | N.D.     | N.D.     |
| C1             | CA30          | 38.3                   | 0.3                           | -8.1                          | 39.36     | 4400     | 186      | 77       | 2018     | 705      |
| C1             | CA31          | 42.8                   | 0.0                           | -7.8                          | 37.91     | 4100     | 124      | 64       | 2455     | 4        |
| C1             | CA54          | 47.8                   | -0.3                          | -7.5                          | 37.71     | 3500     | 121      | 106      | 2359     | 15       |
| C1             | CA56          | 49.9                   | -0.4                          | -7.2                          | N.D.      | N.D.     | N.D.     | N.D.     | N.D.     | N.D.     |
| C2             | CA6           | 10.2                   | 0.2                           | -8.3                          | 38.06     | 3800     | 88       | 88       | 1176     | 29       |
| C2             | CA17          | 23.8                   | 0.0                           | -8.8                          | 39.49     | 3400     | 190      | 111      | 752      | 20       |
| C2             | CA20          | 26.3                   | 0.0                           | -8.6                          | 38.93     | 2471     | 114      | 113      | 600      | 16       |
| C2             | CA40          | 29.0                   | -0.5                          | -8.9                          | N.D.      | N.D.     | N.D.     | N.D.     | N.D.     | N.D.     |
| C2             | CA47          | 30.2                   | -0.4                          | -8.9                          | 38.34     | 3900     | 233      | 116      | 457      | 13       |
| C2             | CA31          | 42.8                   | -0.1                          | -8.6                          | 38.39     | 2900     | 39       | 86       | 901      | 9        |
| C3             | CA9           | 10.5                   | -0.1                          | -7.2                          | 39.46     | 3700     | 75       | 226      | 75       | 11       |
| C3             | CA36          | 11.5                   | -0.3                          | -7.1                          | 38.96     | 3300     | 88       | 206      | 59       | 181      |
| C3             | CA38          | 19.5                   | -0.7                          | -6.7                          | N.D.      | N.D.     | N.D.     | N.D.     | N.D.     | N.D.     |
| C3             | CA38          | 19.5                   | -1.0                          | -7.5                          | N.D.      | N.D.     | N.D.     | N.D.     | N.D.     | N.D.     |
| C3             | CA17          | 23.8                   | -0.3                          | -6.6                          | 38.82     | 2800     | 73       | 164      | 107      | 5        |
| C3             | CA17          | 23.8                   | -0.4                          | -7.1                          | N.D.      | N.D.     | N.D.     | N.D.     | N.D.     | N.D.     |
| C3             | CA22          | 26.6                   | -0.7                          | -7.0                          | 38.84     | 2715     | 492      | 188      | 134      | 1        |
| C3             | CA21          | 26.8                   | -0.5                          | -7.0                          | N.D.      | N.D.     | N.D.     | N.D.     | N.D.     | N.D.     |
| C3             | CA30          | 38.3                   | 0.4                           | -6.4                          | 38.81     | 2700     | 48       | 120      | 102      | 24       |
| C3             | CA54          | 47.8                   | -0.6                          | -7.0                          | 38.52     | 2600     | 322      | 370      | 275      | 24       |
| C3             | CA41          | 49.5                   | -0.5                          | -7.1                          | N.D.      | N.D.     | N.D.     | N.D.     | N.D.     | N.D.     |
| C3             | CA56          | 49.9                   | -0.6                          | -6.2                          | 39.39     | 2691     | 285      | 194      | 352      | 12       |
| C4             | CA1           | 0.5                    | -0.1                          | -8.5                          | N.D.      | N.D.     | N.D.     | N.D.     | N.D.     | N.D.     |
| C4             | CA2           | 1.2                    | 0.2                           | -8.0                          | 39.58     | 3211     | 2684     | 1632     | 279      | 0        |
| C4             | CA4           | 6.1                    | 0.3                           | -7.9                          | N.D.      | N.D.     | N.D.     | N.D.     | N.D.     | N.D.     |
| C4             | CA6           | 10.2                   | 0.2                           | -7.8                          | N.D.      | N.D.     | N.D.     | N.D.     | N.D.     | N.D.     |
| C4             | CA9           | 10.5                   | -0.3                          | -7.6                          | 39.42     | 3400     | 331      | 187      | 82       | 109      |
| C4             | CA33          | 10.8                   | 0.0                           | -8.4                          | N.D.      | N.D.     | N.D.     | N.D.     | N.D.     | N.D.     |
| C4             | CA39          | 26.4                   | -0.6                          | -8.1                          | 39.39     | 4837     | 2050     | 281      | 248      | 502      |
| C4             | CA39          | 26.4                   | -0.9                          | -7.7                          | N.D.      | N.D.     | N.D.     | N.D.     | N.D.     | N.D.     |

|    |      |      |      |      |       |      |      |      |      |        |
|----|------|------|------|------|-------|------|------|------|------|--------|
| C4 | CA39 | 26.4 | -0.7 | -8.2 | 40.56 | 5022 | 1911 | 267  | 289  | 6444*  |
| C4 | CA40 | 29.0 | -0.7 | -7.4 | 38.09 | 2700 | 464  | 187  | 93   | 424    |
| C4 | CA47 | 30.2 | -1.0 | -8.2 | N.D.  | N.D. | N.D. | N.D. | N.D. | N.D.   |
| C4 | CA47 | 30.2 | -0.5 | -8.2 | N.D.  | N.D. | N.D. | N.D. | N.D. | N.D.   |
| C4 | CA28 | 33.1 | 0.0  | -8.2 | N.D.  | N.D. | N.D. | N.D. | N.D. | N.D.   |
| C4 | CA30 | 38.3 | 0.2  | -7.8 | 39.17 | 4700 | 1000 | 157  | 203  | 345    |
| C4 | CA31 | 42.8 | -0.1 | -8.2 | N.D.  | N.D. | N.D. | N.D. | N.D. | N.D.   |
| C4 | CA31 | 42.8 | 0.0  | -8.6 | N.D.  | N.D. | N.D. | N.D. | N.D. | N.D.   |
| C4 | CA54 | 47.8 | -0.5 | -7.7 | 39.56 | 4200 | 1117 | 489  | 383  | 213    |
| C4 | CA56 | 49.9 | -0.5 | -7.6 | N.D.  | N.D. | N.D. | N.D. | N.D. | N.D.   |
| C4 | CA41 | 49.5 | -0.6 | -8.1 | N.D.  | N.D. | N.D. | N.D. | N.D. | N.D.   |
| C4 | CA43 | 49.5 | -0.9 | -7.8 | N.D.  | N.D. | N.D. | N.D. | N.D. | N.D.   |
| C5 | CA5  | 7.6  | -1.1 | -9.7 | N.D.  | N.D. | N.D. | N.D. | N.D. | N.D.   |
| C5 | CA6  | 10.2 | 0.0  | -9.4 | 26.88 | 1900 | 493  | 85   | 4627 | 20408* |
| C5 | CA39 | 26.4 | -2.1 | -8.8 | N.D.  | N.D. | N.D. | N.D. | N.D. | N.D.   |
| C5 | CA69 | 28.1 | -1.4 | -8.6 | N.D.  | N.D. | N.D. | N.D. | N.D. | N.D.   |
| C5 | CA28 | 33.1 | -2.0 | -9.4 | 38.99 | 2100 | 149  | 153  | 1015 | 26     |
| C5 | CA61 | 50.1 | -1.8 | -8.9 | N.D.  | N.D. | N.D. | N.D. | N.D. | N.D.   |
| C5 | CA41 | 49.5 | -1.4 | -7.9 | 38.60 | 2600 | 792  | 142  | 943  | 311    |

Microspar in borings

|    |      |      |      |      |      |      |      |      |      |      |
|----|------|------|------|------|------|------|------|------|------|------|
| MS | CA37 | 12.1 | 0.0  | -4.8 | N.D. | N.D. | N.D. | N.D. | N.D. | N.D. |
| MS | CA14 | 17.4 | -0.8 | -8.0 | N.D. | N.D. | N.D. | N.D. | N.D. | N.D. |
| MS | CA64 | 17.5 | -1.3 | -4.9 | N.D. | N.D. | N.D. | N.D. | N.D. | N.D. |
| MS | CA19 | 23.4 | -0.2 | -7.0 | N.D. | N.D. | N.D. | N.D. | N.D. | N.D. |
| MS | CA54 | 47.8 | 0.0  | -7.7 | N.D. | N.D. | N.D. | N.D. | N.D. | N.D. |
| MS | CA56 | 49.9 | -0.2 | -7.2 | N.D. | N.D. | N.D. | N.D. | N.D. | N.D. |
| MS | CA57 | 50.9 | -0.5 | -8.1 | N.D. | N.D. | N.D. | N.D. | N.D. | N.D. |

Dolomite

|    |      |      |      |      |       |       |      |      |      |      |
|----|------|------|------|------|-------|-------|------|------|------|------|
| D2 | CA6  | 10.2 | 0.4  | -8.0 | N.D.  | N.D.  | N.D. | N.D. | N.D. | N.D. |
| D2 | CA33 | 10.8 | -0.1 | -7.2 | 25.97 | 4.25  | 1.11 | 295  | 223  | 108  |
| D2 | CA19 | 23.4 | 0.0  | -7.9 | 24.15 | 9.10  | 1.84 | 426  | 112  | 42   |
| D2 | CA39 | 26.4 | 0.0  | -7.8 | 24.20 | 10.74 | 2.44 | 0    | 180  | 17   |
| D2 | CA39 | 26.4 | 0.0  | -7.8 | 25.21 | 10.38 | 2.39 | 661  | 166  | 86   |
| D2 | CA22 | 26.6 | 0.1  | -7.0 | N.D.  | N.D.  | N.D. | N.D. | N.D. | N.D. |
| D2 | CA21 | 26.8 | -0.2 | -8.1 | 23.56 | 10.96 | 2.40 | 0    | 152  | 22   |
| D2 | CA69 | 28.1 | 0.0  | -7.5 | 23.29 | 10.23 | 2.33 | 0    | 500  | 445  |
| D2 | CA40 | 29.0 | 0.2  | -7.7 | 24.36 | 13.31 | 2.38 | 0    | 175  | 68   |

Oysters

|      |     |      |      |      |      |      |      |      |      |
|------|-----|------|------|------|------|------|------|------|------|
| SBX1 | 2.1 | -3.6 | N.D. |
| SBX2 | 1.8 | -3.1 | N.D. |
| FE11 | 2.5 | -2.0 | N.D. |
| FE49 | 2.6 | -2.4 | N.D. |

\* Contaminated by barite.

TABLE DR2: SULFATE ISOTOPIC DATA

| Sample type | Sample number | Position<br>(m from base) | $\delta^{34}\text{S}$<br>(‰ CDT) | $\delta^{18}\text{O}$<br>(‰ PDB) |
|-------------|---------------|---------------------------|----------------------------------|----------------------------------|
| Barite      | CA6           | 10.2                      | 35.0                             | 17.9                             |
| Barite      | CA6           | 10.2                      | 30.1                             | 17.2                             |
| Barite      | CA17          | 24.8                      | 24.9                             | 16.6                             |
| Barite      | CA69          | 28.1                      | 36.0                             | 17.4                             |
| Barite      | CA72          | above reef                | 24.1                             | 18.6                             |
| Celestite   | CA43          | 49.5                      | 20.0                             | 16.0                             |
